# Supplementary material
Source: PubMed Central journal article supplement (PMC3989698)
Supplement: embr0015-0315-sd1.pdf [file embr0015-0315-sd1.pdf]

Manuscript EMBO-2013-37936

## **Type VI secretion and bacteriophage tail tubes share a common assembly pathway**

Yannick R. Brunet, Jerome Henin, Herve Celia and Eric Cascales

*Corresponding author: Eric Cascales, CNRS - Aix-Marseille Universite*

---

### **Review timeline:**

Submission date:  
Accepted:

31 August 2013  
12 December 2013

---

### **Transaction Report:**

No Peer Review Process File is available with this article, as the authors have chosen not to make the review process public in this case.
