# Supplementary material
Source: PubMed Central journal article supplement (PMC3989698)
Supplement: embr0015-0315-sd3.pdf [file embr0015-0315-sd3.pdf]

## Figure S2

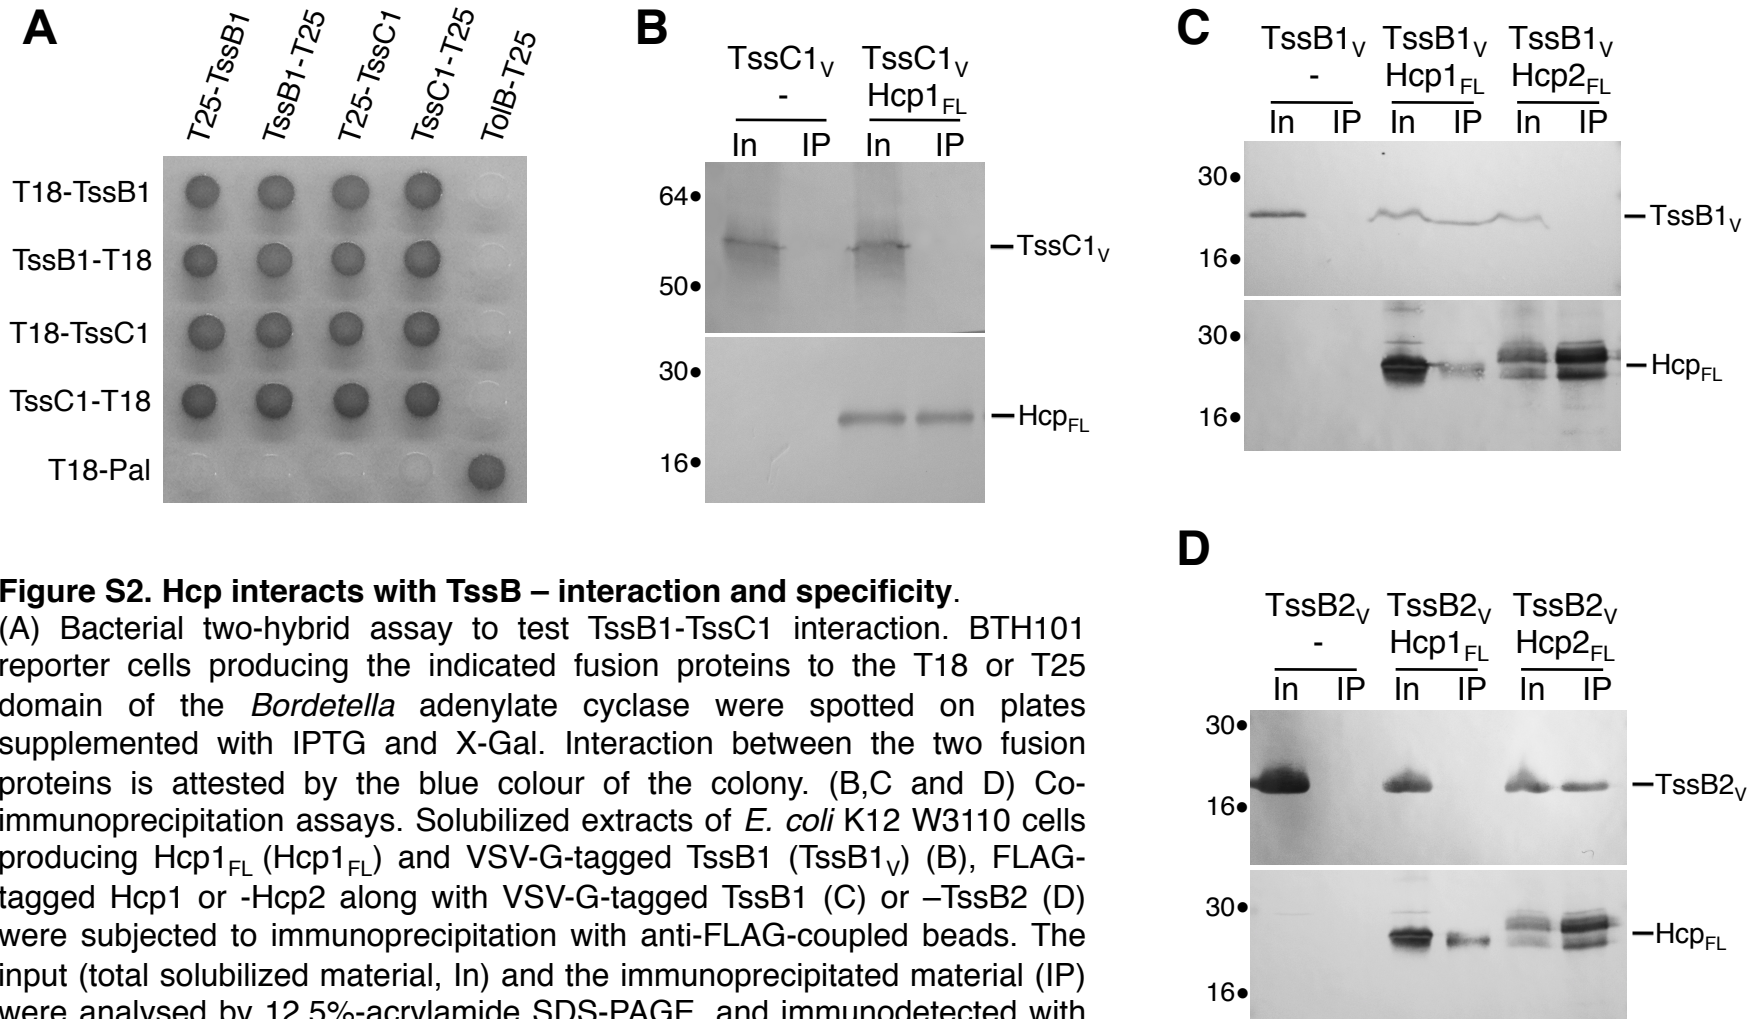

**Figure S2. Hcp interacts with TssB – interaction and specificity.**

(A) Bacterial two-hybrid assay to test TssB1-TssC1 interaction. BTH101 reporter cells producing the indicated fusion proteins to the T18 or T25 domain of the *Bordetella* adenylate cyclase were spotted on plates supplemented with IPTG and X-Gal. Interaction between the two fusion proteins is attested by the blue colour of the colony. (B,C and D) Co-immunoprecipitation assays. Solubilized extracts of *E. coli* K12 W3110 cells producing Hcp1<sub>FL</sub> (Hcp1<sub>FL</sub>) and VSV-G-tagged TssB1 (TssB1<sub>v</sub>) (B), FLAG-tagged Hcp1 or -Hcp2 along with VSV-G-tagged TssB1 (C) or -TssB2 (D) were subjected to immunoprecipitation with anti-FLAG-coupled beads. The input (total solubilized material, In) and the immunoprecipitated material (IP) were analysed by 12.5%-acrylamide SDS-PAGE, and immunodetected with anti-FLAG (Hcp1 or Hcp2; lower panel) and anti-VSV-G (TssB1 or TssB2; upper panel) monoclonal antibodies. Immunodetected proteins are indicated on the right. Molecular weight markers (in kDa) are indicated on the left.
