# Supplementary material
Source: PubMed Central journal article supplement (PMC3989698)
Supplement: embr0015-0315-sd4.pdf [file embr0015-0315-sd4.pdf]

## Figure S3

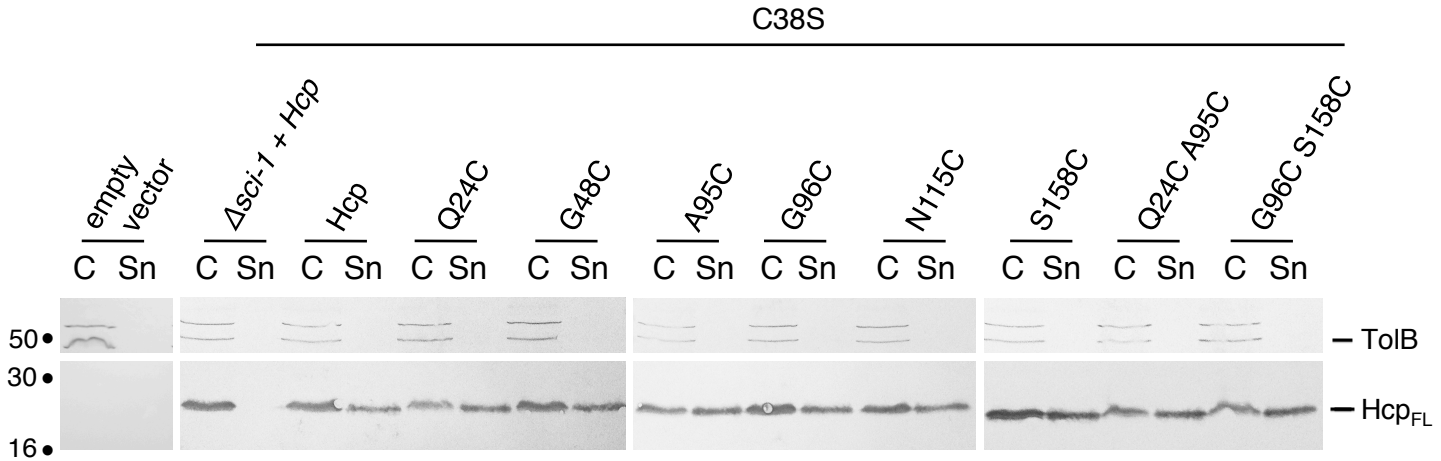

### Figure S3. *In vivo* Hcp cysteine variants release.

Release of Hcp cysteine variants was assessed by separating whole cells (C) and supernatant (Sn) fractions from  $\Delta hcp$  cells carrying the empty vector or plasmid encoding the indicated substituted Hcp protein.  $2 \times 10^8$  cells and the TCA-precipitated material of the supernatant from  $5 \times 10^8$  cells were subjected to 12.5%-acrylamide SDS-PAGE and immunodetection using the anti-ToIB polyclonal antibodies (lysis control; upper panel) and the anti-FLAG monoclonal antibodies (Hcp detection, lower panel). A control to show Sci-1 T6SS-dependence for Hcp1 release is shown ( $\Delta sci-1$  strain producing the Hcp1 C38S variant). The proteins are indicated on the right. The molecular weight markers (in kDa) are indicated on the left.
