# Supplementary material
Source: PubMed Central journal article supplement (PMC3989698)
Supplement: embr0015-0315-sd6.pdf [file embr0015-0315-sd6.pdf]

**Table S1.**  
**Strains, plasmids and oligonucleotides used in this study.**

**STRAINS**

| <b>Strains</b>                          | <b>description and genotype</b>                                                                                                                       | <b>source</b>              |
|-----------------------------------------|-------------------------------------------------------------------------------------------------------------------------------------------------------|----------------------------|
| <u>Enteroaggregative <i>E. coli</i></u> |                                                                                                                                                       |                            |
| 17-2                                    | WT enteroaggregative <i>Escherichia coli</i>                                                                                                          | Arlette Darfeuille-Michaud |
| 17-2 $\Delta$ <i>hcp</i>                | 17-2 deleted of the <i>sci-1 hcp</i> gene                                                                                                             | [10]                       |
| 17-2 $\Delta$ <i>sci-1</i>              | 17-2 deleted of the whole <i>sci-1</i> gene cluster                                                                                                   | This study                 |
| 17-2 $\Delta$ <i>tssB1</i>              | 17-2 deleted of the <i>sci-1 tssB</i> gene                                                                                                            | This study                 |
| 17-2 $\Delta$ <i>tssC1</i>              | 17-2 deleted of the <i>sci-1 tssC</i> gene                                                                                                            | This study                 |
| 17-2 $\Delta$ <i>tssBC1</i>             | 17-2 deleted of the <i>sci-1 tssB</i> and <i>tssC</i> genes                                                                                           | This study                 |
| 17-2 $\Delta$ <i>vgrG1</i>              | 17-2 deleted of the <i>sci-1 vgrG</i> gene                                                                                                            | This study                 |
| <u><i>E. coli</i> K12</u>               |                                                                                                                                                       |                            |
| DH5 $\alpha$                            | F-, $\Delta$ ( <i>argF-lac</i> )U169, <i>phoA</i> , <i>supE44</i> , $\Delta$ ( <i>lacZ</i> )M15, <i>relA</i> , <i>endA</i> , <i>thi</i> , <i>hsdR</i> | Laboratory collection      |
| W3110                                   | F-, lambda- IN( <i>rrnD-rrnE</i> )1 <i>rph-1</i>                                                                                                      | Laboratory collection      |

## PLASMIDS

|                               |                                                                      |            |
|-------------------------------|----------------------------------------------------------------------|------------|
| pUC12                         | empty vector, pColE1 origin, <i>Plac</i> , Amp <sup>R</sup>          | [22]       |
| pUC-Hcp1-FLAG                 | <i>sci-1 hcp (hcp1)</i> cloned into pUC12, C-terminal FLAG epitope   | [10]       |
| pUC-Hcp2-FLAG                 | <i>sci-2 hcp (hcp2)</i> cloned into pUC12, C-terminal FLAG epitope   | This study |
| pUC-Hcp1-FLAG N115C           | code for Hcp1 harbouring the N115C mutation                          | This study |
| pUC-Hcp1-FLAG C38S            | code for Hcp1 harbouring the C38S mutation                           | This study |
| pUC-Hcp1-FLAG C38S Q24C       | code for Hcp1 harbouring the C38S and Q24C mutations                 | This study |
| pUC-Hcp1-FLAG C38S G48C       | code for Hcp1 harbouring the C38S and G48C mutations                 | This study |
| pUC-Hcp1-FLAG C38S A95C       | code for Hcp1 harbouring the C38S and A95C mutations                 | This study |
| pUC-Hcp1-FLAG C38S G96C       | code for Hcp1 harbouring the C38S and G96C mutations                 | This study |
| pUC-Hcp1-FLAG C38S N115C      | code for Hcp1 harbouring the C38S and N115C mutations                | This study |
| pUC-Hcp1-FLAG C38S S158C      | code for Hcp1 harbouring the C38S and S158C mutations                | This study |
| pUC-Hcp1-FLAG C38S Q24C A95C  | code for Hcp1 harbouring the C38S, Q24C and A95C mutations           | This study |
| pUC-Hcp1-FLAG C38S G96C S158C | code for Hcp1 harbouring the C38S, G96C and S158C mutations          | This study |
| pUC-Hcp1-FLAG S158W           | code for Hcp1 harbouring the S158W mutation                          | This study |
| pT18-FLAG                     | Bacterial Two Hybrid (BACTH) vector                                  | [23]       |
| pT18-Hcp1                     | <i>hcp1</i> cloned downstream the T18 coding sequence in p-T18-FLAG  | This study |
| pHcp1-T18                     | <i>hcp1</i> cloned upstream the T18 coding sequence in p-T18-FLAG    | This study |
| pT18-TssB1                    | <i>tssB1</i> cloned downstream the T18 coding sequence in p-T18-FLAG | This study |
| pTssB1-T18                    | <i>tssB1</i> cloned upstream the T18 coding sequence in p-T18-FLAG   | This study |
| pT18-TssC1                    | <i>tssC1</i> cloned downstream the T18 coding sequence in p-T18-FLAG | This study |
| pTssC1-T18                    | <i>tssC1</i> cloned upstream the T18 coding sequence in p-T18-FLAG   | This study |
| pT18-Pal                      | <i>pal</i> cloned downstream the T18 coding sequence in p-T18-FLAG   | [23]       |
| pT25-FLAG                     | Bacterial Two Hybrid (BACTH) vector                                  | [23]       |
| pT25-Hcp1                     | <i>hcp1</i> cloned downstream the T25 coding sequence in p-T25-FLAG  | This study |
| pHcp1-T25                     | <i>hcp1</i> cloned upstream the T25 coding sequence in p-T25-FLAG    | This study |
| pT25-TssB1                    | <i>tssB1</i> cloned downstream the T25 coding sequence in p-T25-FLAG | This study |
| pTssB1-T25                    | <i>tssB1</i> cloned upstream the T25 coding sequence in p-T25-FLAG   | This study |

|                    |                                                                                                          |                |
|--------------------|----------------------------------------------------------------------------------------------------------|----------------|
| pT25-TssC1         | <i>tssC1</i> cloned downstream the T25 coding sequence in p-T25-FLAG                                     | This study     |
| pTssC1-T25         | <i>tssC1</i> cloned upstream the T25 coding sequence in p-T25-FLAG                                       | This study     |
| pTolB-T25          | <i>tolB</i> cloned upstream the T25 coding sequence in p-T25-FLAG                                        | [23]           |
| pBAD33             | empty vector, pACYC184 origin, <i>Para</i> , <i>araC</i> , Cm <sup>R</sup>                               | [24]           |
| pBAD33-TssB1-VSV-G | <i>tssB1</i> cloned into pBAD33, C-terminal VSV-G epitope                                                | This study     |
| pBAD33-TssB2-VSV-G | <i>tssB2</i> cloned into pBAD33, C-terminal VSV-G epitope                                                | This study     |
| pBAD33-TssB1-sfGFP | <i>sfgfp</i> fused in-frame to <i>tssB1</i> (separated by a 3×Ala 3×Gly linker)<br>in pBAD33-TssB1-VSV-G | This study     |
| pBAD33-VgrG-VSV-G  | <i>sci-1 vgrG (vgrG1)</i> cloned into pBAD33, C-terminal VSV-G epitope                                   | This study     |
| pOK12              | empty vector, P15A origin, <i>Plac</i> , Kan <sup>R</sup>                                                | [22]           |
| pOK12-TssB1-HA     | <i>sci-1 tssB (tssB1)</i> cloned into pOK12, C-terminal HA epitope                                       | M.-S. Aschtgen |

## OLIGONUCLEOTIDES

### For strain construction<sup>a</sup>

5-*Δhcp1* TCCCCTGCGCCGGAAGAGGGCGCATCAGAAAACATAACGGAGTAATTTTTGTGTAGGCTGGAGCTGCTTCG  
3-*Δhcp1* TGAAGAAAAAATAAAAATGACGGACAGGATGCCCTGTCCGTCCGGCAGAACATATGAATATCCTCCTTAGTTCC  
5-*Δsci-1* GGAGGCATCTGCGGTGATGGAACCCCTGAGATGCAGGTTTCACAGGAGAGAGCCTGTGTAGGCTGGAGCTGCTTCG  
3-*Δsci-1* CATATATCCATCGCTGTTTATTTATTTCTGTTCTGCCCTCCCTGCTCCGGCCATATGAATATCCTCCTTAGTTC  
5-*ΔtssB1* GCATCTGCGGTGATGGAACCCCTGAGATGCAGGTTTCACAGGAGAGAGCCGTGTAGGCTGGAGCTGCTTCG  
3-*ΔtssB1* TTCTTTTCTTTCTGTACAGACATCAGCATTTTCTCTCGTAATCCGTTAAACATATGAATATCCTCCTTAGTTCC  
5-*ΔtssC1* TGCGTGCACTGGTGCCGGAAAAGGCGTGATTTAACGGATTACGAGAGAAAAGTGTAGGCTGGAGCTGCTTCG  
3-*ΔtssC1* GCCCCGTCTTCCCATAATGGGCGATAAATCTTCATTTCCCGACACCTGCCGCATATGAATATCCTCCTTAGTTCC  
5-*ΔvgrG* TACCCTTTCAGAGCTGTTTCGTGGAGTGATAAATCATGAATCTCACTGAGTGTAGGCTGGAGCTGCTTCG  
3-*ΔvgrG* GGTTTTATGGGTGGCATCTGTTACGTCATATCCCTGATATTTTGTTCATTCATATGAATATCCTCCTTAGTTCC

### For plasmid construction<sup>b, c, d</sup>

5pUC-Hcp2-FLAG GGAAACAGCTATGACCATGATTACGAATATGGTCCGGAGTTATGAGTA  
3pUC-Hcp2-FLAG AAGAGGATCCCCGGGCGAGCTCGATTATTTATCATACTCATCTTTATAATCTACAAGAGCCT  
CTTTATATAAG  
5pBAD-TssB1-VSV-G CTCTCTACTGTTTCTCCATACCCGTTTTTTTTGGGCTAGCAGGAGGTATTACACCATGAGCAGTT  
CGTTTCAGAATGAAATCCCG  
3pBAD-TssB1-VSV-G GGTCGACTCTAGAGGATCCCCGGGTACCTTATTTTCCTAATCTATTCATTTCAATATCTGTA  
TACGCCTTTTCCGGCACCAGTGAC  
5pBAD-TssB2-VSV-G CTCTCTACTGTTTCTCCATACCCGTTTTTTTTGGGCTAGCAGGAGGTATTACACCATGAGCAATA  
CACAACATAAACTTGATAAAAC  
3pBAD-TssB2-VSV-G GGTCGACTCTAGAGGATCCCCGGGTACCTTATTTTCCTAATCTATTCATTTCAATATCTGTA  
TATTCCTTACTTTCATCGTTTTTCAGGATTG

|                   |                                                                                                                 |
|-------------------|-----------------------------------------------------------------------------------------------------------------|
| 5pBAD-TssB1-sfGFP | <u>CACTGGTGCCGGAAAAGGCGGCAGCGGCCGGCGGAGGGTCTAAAGGTGAAGAACTG TTCACCG</u>                                         |
| 3pBAD-TssB1-sfGFP | <u>CGGGTACCTTATTTTCTAATCTATTCATTTCAATATCTGTATAGGAAACAGCTATGACCATGATTACG</u>                                     |
| 5pBAD-VgrG1-VSV-G | <u>CTCTCTACTGTTTCTCCATACCCGTTTTTTTTGGGCTAGCAGGAGGTATTACACCATGAATCTCACTGAC</u><br>TCCCTGCAAAAATGTTTTATCC         |
| 3pBAD-VgrG1-VSV-G | <u>GGTCGACTCTAGAGGATCCCCGGGTACCTTATTTTCTAATCTATTCATTTCAATATCTGTATATTC</u><br>TGTTTCTCCATGAATTTTTACCTTCCCAAACCTC |
| T25T18C-5-Hcp1    | <u>CGGATAACAATTTACACACAGGAAACAGCTATGACCATGGCAATTCAGTTTATCTGTGGCTGAAAG</u><br>ATG                                |
| T18C-3-Hcp1       | <u>CCTCGCTGGCGGCTAAGCTTGCGTAATCGCGGTGGTACGCTCACTCCATGCG</u>                                                     |
| T25C-3-Hcp1       | <u>GTTTGCGTAACCAGCCTGATGCGATTGCTGCGCGGTGGTACGCTCACTCCATGCG</u>                                                  |
| T25T18N-3-Hcp1    | <u>CGAGGTCGACGGTATCGATAAGCTTGATATCGAATTCTAGTTACGCGGTGGTACGCTCACTCCATGCG</u>                                     |
| T18N-5-Hcp1       | <u>CGCCACTGCAGGGATTATAAAGATGACGATGACAAGGCAATTCAGTTTATCTGTGGCTGAAAGATG</u>                                       |
| T25N-5-Hcp1       | <u>GGCGGGCTGCAGATTATAAAGATGACGATGACAAGGCAATTCAGTTTATCTGTGGCTGAAAGATG</u>                                        |
| T25T18C-5-TssB1   | <u>CGGATAACAATTTACACACAGGAAACAGCTATGACCATGAGCAGTTCGTTTCAGAATGAAATCCCGA</u><br>AAGCAAG                           |
| T18C-3-TssB1      | <u>CCTCGCTGGCGGCTAAGCTTGCGTAATCGCCTTTTCCGGCACCAAGTGCACGC</u>                                                    |
| T25C-3-TssB1      | <u>GTTTGCGTAACCAGCCTGATGCGATTGCTGCGCCTTTTCCGGCACCAAGTGCACGC</u>                                                 |
| T25T18N-3-TssB1   | <u>CGAGGTCGACGGTATCGATAAGCTTGATATCGAATTCTAGTTACGCCTTTTCCGGCACCAAGTGCACGC</u>                                    |
| T18N-5-TssB1      | <u>CGCCACTGCAGGGATTATAAAGATGACGATGACAAGAGCAGTTCGTTTCAGAATGAAATCCCGAAAG</u><br>CAAG                              |
| T25N-5-TssB1      | <u>GGCGGGCTGCAGATTATAAAGATGACGATGACAAGAGCAGTTCGTTTCAGAATGAAATCCCGAAAGC</u><br>AAG                               |
| T25T18C-5-TssC1   | <u>CGGATAACAATTTACACACAGGAAACAGCTATGACCATGCTGATGTCTGTACAGAAAGAAAAGAACGT</u><br>TGCAGAGAGCG                      |
| T18C-3-TssC1      | <u>CCTCGCTGGCGGCTAAGCTTGCGTAATCGCCTTTTGCCTTCGGCATCTGCGAAACCAAGTG</u>                                            |
| T25C-3-TssC1      | <u>GTTTGCGTAACCAGCCTGATGCGATTGCTGCGCCTTTTGCCTTCGGCATCTGCGAAACCAAGTG</u>                                         |
| T25T18N-3-TssC1   | <u>CGAGGTCGACGGTATCGATAAGCTTGATATCGAATTCTAGTTACGCTTTTGCCTTCGGCATCTGCGAA</u><br>ACCAAGTG                         |
| T18N-5-TssC1      | <u>CGCCACTGCAGGGATTATAAAGATGACGATGACAAGCTGATGTCTGTACAGAAAGAAAAGAACGTT</u><br>GCAGAGAGCG                         |
| T25N-5-TssC1      | <u>GGCGGGCTGCAGATTATAAAGATGACGATGACAAGCTGATGTCTGTACAGAAAGAAAAGAACGTTG</u><br>CAGAGAGCG                          |

For site-directed mutagenesis <sup>e</sup>

|              |                                                      |
|--------------|------------------------------------------------------|
| A-Hcp1-N115C | CGTGAAGGTGGTGAAGGTTT <u>G</u> CCCCGGTCATGCACGACATC   |
| B-Hcp1-N115C | GATGTCGTGCATGACCGGG <u>C</u> AAACCTTCACCACCTTCACG    |
| A-Hcp1-S158C | CATTCATTCCGACGCATGGT <u>G</u> TGAGCGTACCACCGCGTAA    |
| B-Hcp1-S158C | TTACGCGGTGGTACGCTC <u>A</u> CACCATGCGTCGGAATGAATG    |
| A-Hcp1-Q24C  | CAAAGGGTCCGTGGATGTTT <u>G</u> CGACCGTGAGGGCAGCATTG   |
| B-Hcp1-Q24C  | CAATGCTGCCCTCACGGTC <u>G</u> CAAACATCCACGGACCCTTTG   |
| A-Hcp1-G48C  | TCCCGACGGATAACAATACCT <u>G</u> TAAGCTGACCGGTACCCG    |
| B-Hcp1-G48C  | CGGGTACCGGTCAGCTT <u>A</u> CAGGTATTGTTATCCGTCGGGA    |
| A-Hcp1-A95C  | GTGGTACAAAATCAATGAT <u>T</u> GCGGTCAGGAGGTGGAGTATTC  |
| B-Hcp1-A95C  | GAAATACTCCACCTCCTGACCG <u>C</u> AATCATTGATTTTGTACCAC |
| A-Hcp1-G96C  | GTACAAAATCAATGATGCCT <u>G</u> TGCAGGAGGTGGAGTATTC    |
| B-Hcp1-G96C  | GAAATACTCCACCTCCTG <u>A</u> CAGGCATCATTGATTTTGTAC    |
| A-Hcp1-C38S  | GTGGTGGCTCAGGAGCAC <u>A</u> GCCTCTACATCCCGACGG       |
| B-Hcp1-C38S  | CCGTCGGGATGTAGAGGCTGTGCTCCTGAGCCACCAC                |
| A-Hcp1-S158W | CATTCATTCCGACGCATGGT <u>G</u> GGAGCGTACCACCGCGTAA    |
| B-Hcp1-S158W | TTACGCGGTGGTACGCTC <u>A</u> CCCATGCGTCGGAATGAATG     |

<sup>a</sup> Sequences corresponding to the downstream and upstream regions of the gene to be deleted underlined.

<sup>b</sup> Sequence annealing on the target plasmid underlined.

<sup>c</sup> FLAG or VSV-G epitope coding sequence in **Bold**

<sup>d</sup> 3×Ala-3×Gly linker in *italics*.

<sup>e</sup> Mismatch codon underlined.
